# Supplementary material for: A rare large duplication of MLH1 identified in Lynch syndrome
Source: Springer Nature journal article supplement (doi:10.1186/s13053-021-00167-0), 2021-01-19

## Additional file

### A rare large duplication of *MLH1* identified in Lynch syndrome

Abhishek Kumar<sup>1,2,3,#</sup>, Nagarajan Paramasivam<sup>4,#</sup>, Obul Reddy Bandapalli<sup>1,5,6</sup>, Matthias Schlesner<sup>7</sup>, Tianhui Chen<sup>8</sup>, Rolf Sijmons<sup>9</sup>, Dagmara Dymerska<sup>10</sup>, Katarzyna Golebiewska<sup>10</sup>, Magdalena Kuswik<sup>10</sup>, Jan Lubinski<sup>10</sup>, Kari Hemminki<sup>1,11,12,§</sup> and Asta Försti<sup>1,5,6,§,\*</sup>

<sup>1</sup> Division of Molecular Genetic Epidemiology, German Cancer Research Center (DKFZ), Im Neuenheimer Feld 580, D-69120, Heidelberg, Germany

<sup>2</sup> Institute of Bioinformatics, International Technology Park, Bangalore, 560066 India

<sup>3</sup> Manipal Academy of Higher Education (MAHE), Manipal, 576104, Karnataka, India

<sup>4</sup> Computational Oncology, Molecular Diagnostics Program, National Center for Tumor Diseases (NCT), Germany

<sup>5</sup> Hopp Children's Cancer Center (KiTZ), Heidelberg, Germany

<sup>6</sup> Division of Pediatric Neurooncology, German Cancer Research Center (DKFZ), German Cancer Consortium (DKTK), Heidelberg, Germany

<sup>7</sup> Bioinformatics and Omics Data Analytics, German Cancer Research Center (DKFZ), Heidelberg, Germany

<sup>8</sup> Department of Cancer Prevention, Cancer Hospital of the University of Chinese Academy of Sciences (Zhejiang Cancer Hospital), Institute of Cancer and Basic Medicine, Chinese Academy of Sciences, Hangzhou, China

<sup>9</sup> Department of Genetics, University Medical Center Groningen, University of Groningen, The Netherlands

<sup>10</sup> Hereditary Cancer Center, Department of Genetics and Pathology, Pomeranian Medical University, 70-111 Szczecin, Poland

<sup>11</sup> Faculty of Medicine and Biomedical Center in Pilsen, Charles University in Prague, 30605 Pilsen, Czech Republic

<sup>12</sup> Division of Cancer Epidemiology, German Cancer Research Center (DKFZ), Heidelberg, Germany

**Additional file: Table 1** Number of large deletions and duplications in the mismatch repair genes reported in the InSiGHT database and their clinical classification according to Mismatch Repair Gene Variant Classification Criteria by the InSiGHT Variant Interpretation Committee.

| <b>Gene</b> | <b>Total number of deletions</b> | <b>Number of exon-level deletions</b> | <b>Clinical classification</b> | <b>Total number of duplications</b> | <b>Number of exon-level duplications</b> | <b>Clinical classification</b> |
|-------------|----------------------------------|---------------------------------------|--------------------------------|-------------------------------------|------------------------------------------|--------------------------------|
| MLH1        | 290                              | 77                                    | All pathogenic                 | 80                                  | 9                                        | 2 pathogenic, 7 VUS            |
| MSH2        | 276                              | 84                                    | All pathogenic                 | 85                                  | 7                                        | 3 pathogenic, 4 VUS            |
| MSH6        | 152                              | 13                                    | 9 pathogenic, 4 VUS            | 77                                  | 1                                        | VUS                            |
| PMS2        | 35                               | 19                                    | All pathogenic                 | 6                                   | 0                                        |                                |

VUS, variant of uncertain significance

**Additional file: Fig. 1** (Family B) Pedigree of the colorectal cancer family with MLH1 frameshift variant;  
(Family C) Pedigree of the colorectal cancer family with MSH2 splice site variant.

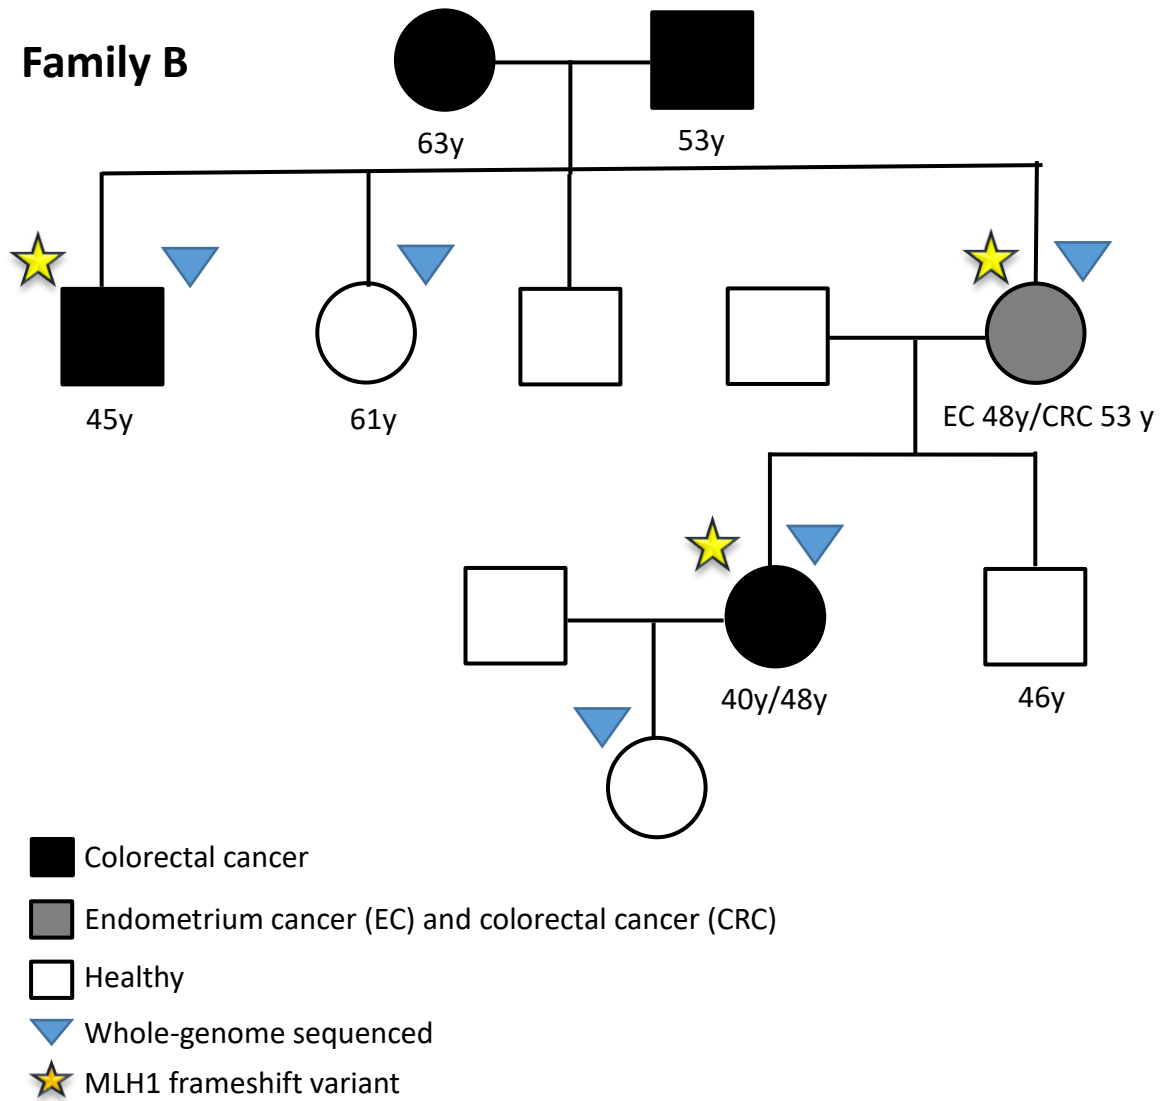

Family C

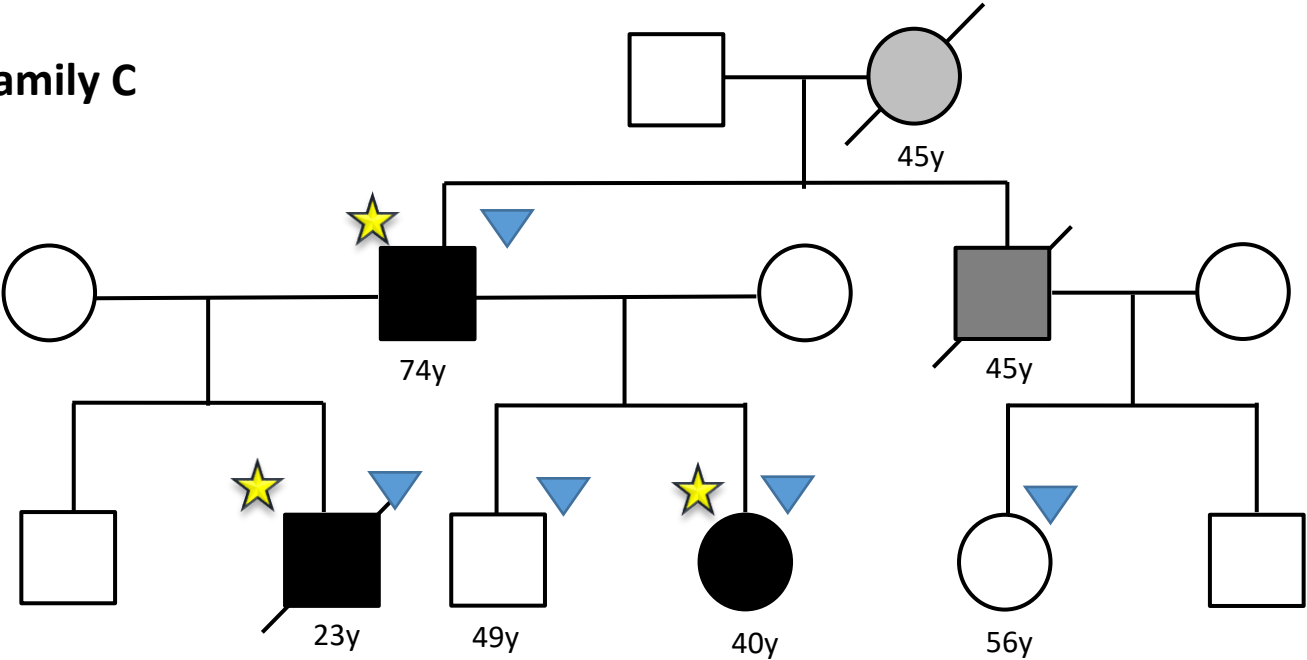

- Colorectal
- Kidney
- Stomach
- Health
- ▼ Whole-genome
- ★ MSH2 splice site

**Additional file: Fig. 2** Microsatellite instability (MSI) analysis of tumor samples of two family members from Family A and one tumor sample from Family C. For each family, individuals with tumor samples analyzed are indicated by an arrow and the MSI plots are shown for the corresponding germline and tumor samples.

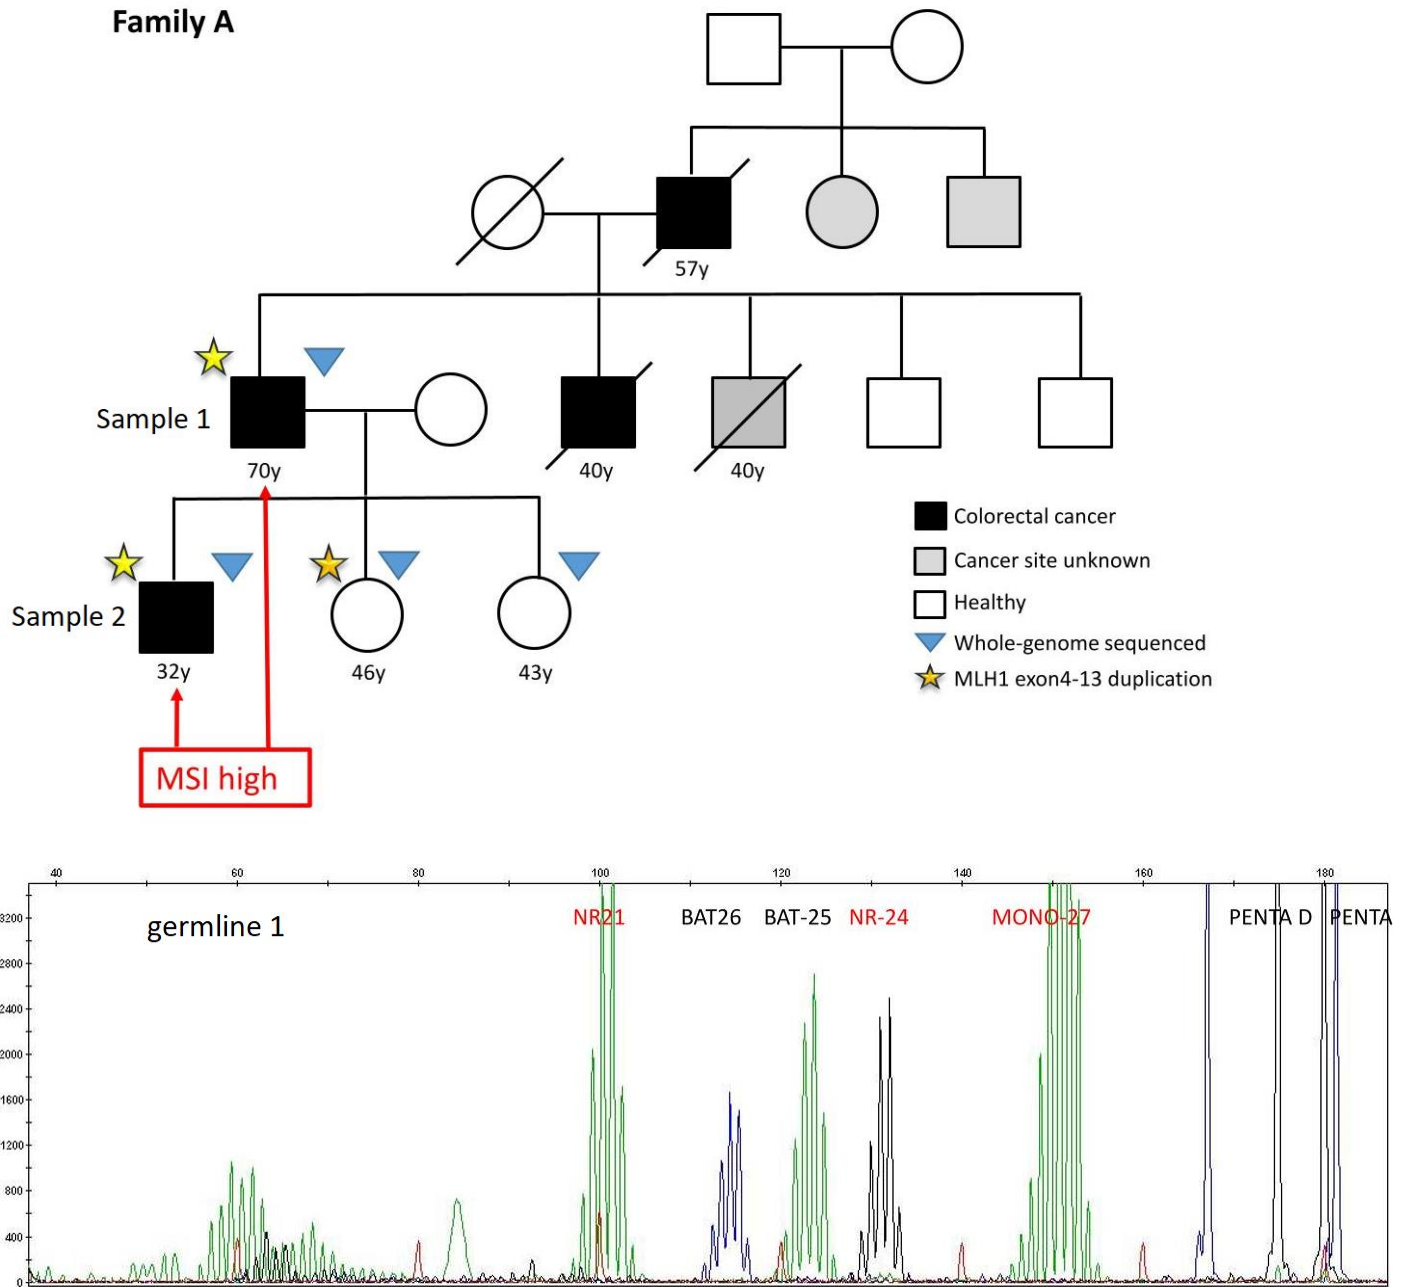

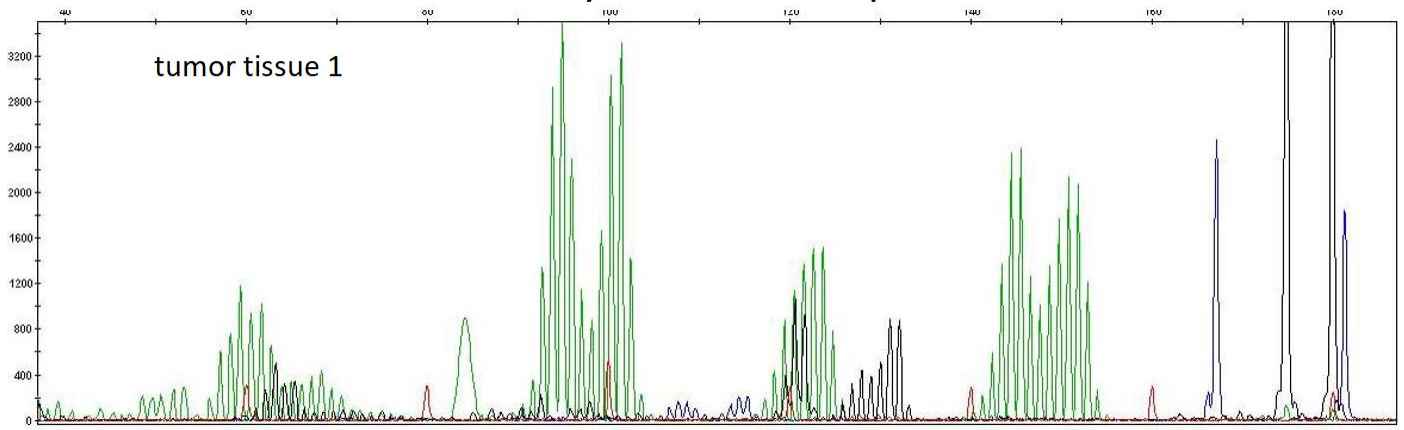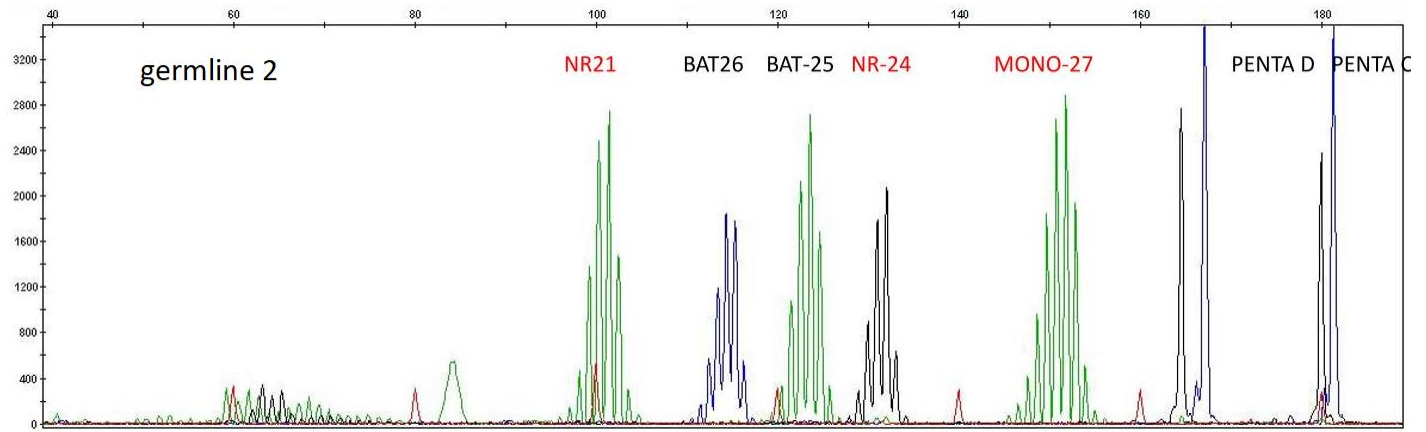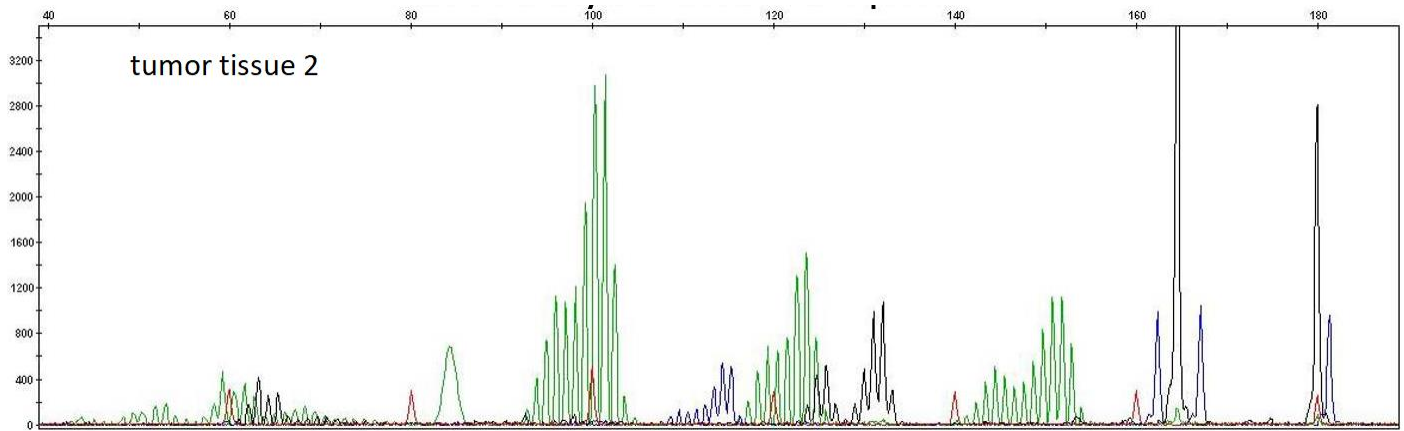

# Family C

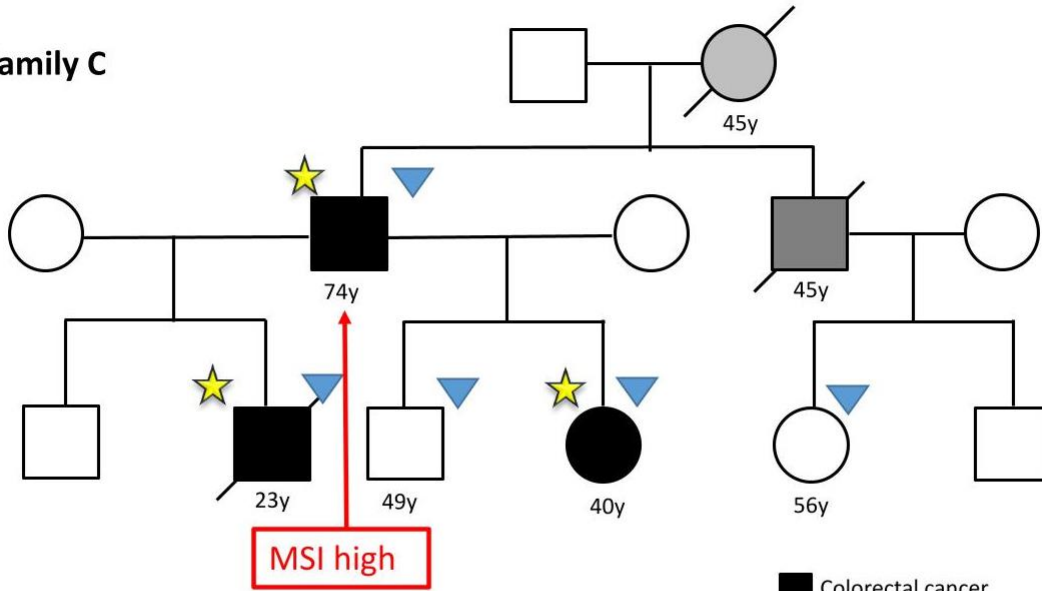

- Colorectal cancer
- Kidney cancer
- Stomach cancer
- Healthy
- ▼ Whole-genome sequenced
- ★ MSH2 splice site mutation

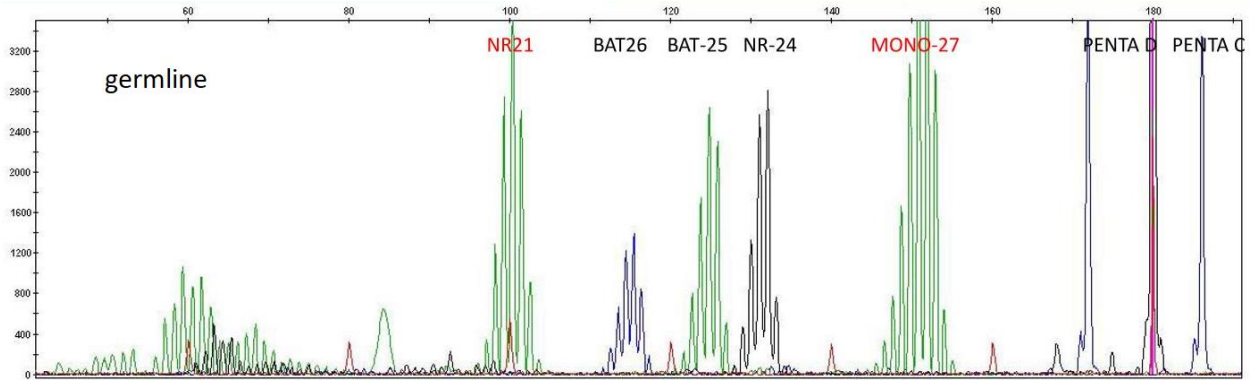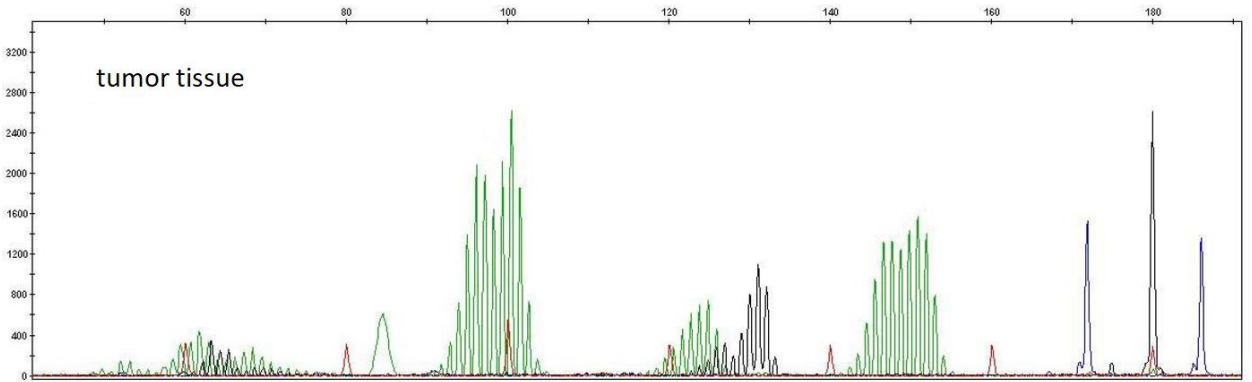

Supplement: MOESM1 [file 18780340]
